# Association of Systemic immune-inflammation index With Short-Term Mortality of Congestive Heart Failure: A Retrospective Cohort Study

1 Yiyang Tang<sup>1</sup>, Yilu Feng<sup>1</sup>, Qin Chen<sup>1</sup>, Xiaofang Zeng<sup>1</sup>, Zhenghui Liu<sup>2</sup>, Hui Luo<sup>3</sup>, Lihuang  
2 Zha<sup>1\*</sup> and Zaixin Yu<sup>1\*</sup>

3 <sup>1</sup> Department of Cardiology, Xiangya Hospital, Central South University, Changsha, Hunan, People's  
4 Republic of China

5 <sup>2</sup> Department of Neurology, Xiangya Hospital, Central South University, Changsha, Hunan, People's  
6 Republic of China

7 <sup>3</sup> Department of Cardiovascular Medicine, the First Hospital of Changsha, Changsha, Hunan,  
8 People's Republic of China

9 \* **Correspondence:**

10 Zaixin Yu

11 yuzaixin@126.com

12 Lihuang Zha

13 [zhalihuang@csu.edu.cn](mailto:zhalihuang@csu.edu.cn)

14 **Keywords:** congestive heart failure<sup>1</sup>, systemic immune-inflammation index<sup>2</sup>, mortality<sup>3</sup>,  
15 biomarker<sup>4</sup>, MIMIC-III<sup>5</sup>.

16 **Abstract**

17 **Purpose:** The present study aimed to clarify the potential predictive significance of Systemic  
18 immune-inflammation index (SII) in assessing the poor prognosis of critically ill patients with  
19 congestive heart failure (CHF).

20 **Methods:** Detailed clinical data were extracted from the Multiparameter Intelligent Monitoring in  
21 Intensive Care III database after gaining access and building the local platform. The 30- and 90-day  
22 and hospital all-cause mortalities of the patient was the primary outcome, and the readmission rate  
23 and the occurrence of major cardiovascular adverse events (MACEs) were the secondary outcomes.  
24 the Cox proportional hazard model and Logistic regression analysis were selected to reveal the  
25 relationship between SII level and the research outcome. Further, the propensity score matching  
26 (PSM) analysis was performed to improve the reliability of results by reducing the imbalance across  
27 groups.

28 **Results:** There were a total of 4604 subjects who passed the screening process and entered the  
29 subsequent analysis. Multivariate regression analysis showed that after adjusting for possible  
30 confounders, including age, heart rate, and albumin, etc., the high level of SII was independently  
31 associated with 30- and 90-day and hospital mortality (tertile 3 versus tertile 1: HR, 95% CIs: 1.23,  
32 1.04-1.45; 1.21, 1.06-1.39; 1.26, 1.05-1.50) and the incidence of MACEs (tertile 3 versus tertile 1:  
33 OR, 95% CI: 1.39, 1.12-1.73) in critically ill patients with CHF, but no significant correlation was  
34 found between SII and the readmission rate. Consistently, patients with high SII level still had a  
35 significantly higher short-term mortality than patients with low SII in the PSM subset.

36 **Conclusion:** In critically ill patients with CHF, high level SII effectively predict high 30- and 90-day  
37 and hospital mortalities, and the high risk of occurrence of MACEs.

## 38 **1 Introduction**

39 Congestive heart failure (CHF) is defined as a pathological condition in which the cardiac output is  
40 insufficient to maintain the perfusion and metabolic needs of various tissues and organs, mainly  
41 characterized by the congestion of pulmonary circulation, accompanied by the corresponding clinical  
42 manifestations such as shortness of breath and decreased activity tolerance<sup>1</sup>. CHF is the severe or  
43 terminal stage of most primary cardiovascular diseases and has increasingly become a major public  
44 problem threatening human health. In the United States and Europe, more than 1 million heart failure  
45 patients are hospitalized each year, and as the population ages, this number is expected to increase by  
46 more than 50% in the next 15 years<sup>2</sup>. In addition, although some progress has been made in the  
47 treatment in recent years, the prognosis of CHF patients is still poor, with 5-year mortality rate as  
48 high as 40-50%<sup>3</sup>. Therefore, accurate assessment and stratification of prognosis are critical to the  
49 clinical management of CHF, and the development of certain prognostic-related biomarkers is also  
50 pressing, which can help clinicians to identify high-risk patients early and take more aggressive  
51 treatment measures<sup>4</sup>.

52 Although the specific pathogenesis of heart failure remains unclear, abnormal immune activation and  
53 chronic inflammation play an important role. The damage, repair and remodeling of myocardium are  
54 important links in the occurrence and development of heart failure, of which immune/inflammatory  
55 cells (neutrophils, lymphocytes, etc.) and the inflammatory factors (tumor necrosis factor,  
56 interleukin-6, etc.) released by them are involved<sup>5</sup>. Inflammatory factors can induce cardiomyocyte  
57 hypertrophy, apoptosis and fibrosis, and ultimately lead to adverse cardiac remodeling and  
58 progressive left ventricular dysfunction<sup>6</sup>. Inflammatory factors have been considered to be  
59 biomarkers for poor prognosis of heart failure, and anti-inflammatory therapy is also expected to  
60 become a new target for the treatment of heart failure<sup>7</sup>.

61 Systemic immune-inflammation index (SII) is a composite inflammatory indicator that combines  
62 three significant immune cells, including neutrophil, lymphocyte, and platelet, and is considered to  
63 be an excellent indicator of local immune response and systemic inflammation<sup>8</sup>. Neutrophils,  
64 platelets and the cytokines they produce are mainly related to non-specific immune responses, while  
65 lymphocytes are considered to be mainly related to specific immune pathways. Compared with the  
66 absolute count of single immune cells, SII has a better representation in reflecting the inflammation  
67 status of the body, with better stability. Until now, SII has been confirmed to be closely correlated  
68 with the poor prognosis of a variety of cardiovascular diseases, including coronary artery disease<sup>9</sup>,  
69 aortic stenosis<sup>10</sup>, infective endocarditis<sup>11</sup>, etc., showing good application prospects, but no studies  
70 have shown that SII is correlated with the prognosis of patients with CHF. In view of this, the present  
71 study attempted to elucidate the independent association between SII and the occurrence of adverse  
72 events such as short-term mortality in critically ill patients with CHF, so as to provide reference for  
73 the prevention and treatment of heart failure.

## 74 **2 Materials and Methods**

### 75 **2.1 Data Sources**

76 All data used in the research and analysis of this study are derived from MIMIC-III (Medical  
77 Information Mart for Intensive Care III) database, a free and open-access large-scale critical care  
78 medicine database developed and run by the Massachusetts Institute of Technology for researchers

79 all over the world. Another advantage of this database, in addition to including the detailed clinical  
80 data such as demographic data, vital signs, laboratory tests, and various treatment information, is that  
81 it provides accurate death information of all subjects, including deaths in the hospital or within 90  
82 days after discharge, which makes it possible for the clinicians to carry out the prognostic related  
83 research. Besides, since this database has been approved by the local ethics committee as a whole and  
84 the individual identifying information of the research subjects has been deleted, this study no longer  
85 needs additional ethical approval.

## 86 **2.2 Population Selection and Exclusion**

87 The subjects of this study are all from the MIMIC-III database<sup>12</sup>, and patients who meet all the  
88 following requirements are included in the subsequent analysis: (1) Patients diagnosed with CHF  
89 based on the ICD-9 code (code 428.0); (2) Adult patients 18 years of age and older; (3) First  
90 admission to ICU. Patients who met one of the following criteria were excluded from the study: (1)  
91 The length of ICU stay was shorter than 24 hours; (2) Absence of SII results during hospitalization;  
92 (3) Survival time was less than 0 (the time of death of some organ donors may be earlier than the  
93 admission). The detailed process of inclusion and exclusion of research objects is shown in Figure 1.

## 94 **2.3 Study Outcomes**

95 The short-term mortality, including the 30- and 90-day and hospital all-cause mortalities of critically  
96 ill patients with CHF, were selected as the primary study outcome, while the secondary study  
97 outcome events were defined as the patients' readmission rate and the occurrence of major adverse  
98 cardiac events (MACEs), which is a composite outcome event, including all-cause death,  
99 readmission for acute heart failure, the use of mechanical circulatory support and the implementation  
100 of heart transplantation<sup>13</sup>.

## 101 **2.4 Data Extraction and Integration**

102 Through the PostgreSQL software (version 9.6, <https://www.postgresql.org/>), we extracted detailed  
103 clinical data of the research subjects from the MIMIC-III database, including demographic data (age,  
104 gender, race, etc.), comorbidities (hypertension, diabetes mellitus, atrial fibrillation, etc.), vital signs  
105 (heart rate, blood pressure, respiratory rate, etc.), severity of illness scores (SOFA and SAPSII  
106 scores), laboratory tests (blood routine, electrolytes, etc.) and intervention measures (dialysis,  
107 mechanical ventilation, etc.). And the value of SII is equal to the product of the platelet count and the  
108 neutrophil count divided by the lymphocyte count<sup>14</sup>.

109 After separately extracting the required tables from the MIMIC-III database, the Stata software  
110 (version 16, <https://www.stata.com/>) was used to process and merge these original table and generate  
111 a complete table that can be used for subsequent analysis. Use the "winsorize" function to identify  
112 and process outliers, and fill in missing values through multiple compensation methods.

## 113 **2.5 Statistical Analyses**

114 The continuous variables were presented in the form of mean  $\pm$  standard deviation (SD) or median  
115 (interquartile range). If continuous variables satisfy both normal distribution and homogeneity of  
116 variance, one-way analysis of variance is used for analysis, while the Mann-Whitney U test was  
117 conducted if the normal distribution or homogeneity of variance were not satisfied. Categorical  
118 variables are expressed in the form of the number of cases (percentage), with the chi-square test (or  
119 Fisher's exact method) for analysis.

120 We constructed a generalized additive model (GAM) to determine the non-linear relationship  
121 between SII and 30- and 90-day all-cause mortality in critically ill patients with CHF. In addition, we  
122 also visually show the relationship between SII and patients' survival through the Kaplan-Meier (K-  
123 M) curve, and use the Log-rank test for hypothesis testing.

124 In order to relieve the interference of possible confounding factors on the results, we completed  
125 univariate and multivariate regression analysis to further clarify the relationship between SII and  
126 outcome variables. In the crude model, no variables were adjusted. In model I, the age, gender, and  
127 race variables were adjusted, while model II further adjusted other 13 variables on the basis of these  
128 variables of model II, including heart rate, blood urea nitrogen (BUN), albumin, troponin T (cTnT),  
129 N-terminal probrain natriuretic peptide (NT-proBNP), urine output of first day, cardiac index, the  
130 type of first ICU admission, the use of mechanical ventilation and vasopressor, pneumonia, and liver  
131 diseases. The selection of confounding factors follows the following principles<sup>15</sup>: (1) A certain factor  
132 has an influence of more than 10% on the research variable; (2) Some factors may have a significant  
133 impact on the outcome variable based on past experience. Besides, we use the variance inflation  
134 factor (VIF) to test the multicollinearity between variables with 5 as the threshold, and the variables  
135 with a high degree of collinearity, serum chloride, were deleted to avoid over-fitting of the model.  
136 The Cox regression analysis was used to determine the relationship between SII and short-term  
137 mortality in critically ill patients with CHF, while Logistic regression analysis was used to analyze  
138 the association between SII and readmission rates or MACEs.

139 To further enhance the credibility of our analysis, we performed the subgroup analysis and  
140 propensity score matching (PSM) analysis. First, By the subgroup analysis, determine whether the  
141 correlation between the SII and the high 30-day all-cause mortality in critically ill patients with CHF  
142 is consistent across various subgroups stratified mainly by comorbidities, and reflect the stability of  
143 SII as a prognostic marker. The optimal cut-off value of SII for the short-term mortality was  
144 determined by the X-tile (version 3.6.1, Yale University School of Medicine) software, and then the  
145 entire study population was divided into two groups, namely the high SII group and the low SII  
146 group. In this study, all variables with uneven distribution between the two groups of patients were  
147 included in the PSM model as covariates, and the corresponding propensity score was calculated by  
148 Logistic regression. Then the two groups of individuals with similar propensity scores were matched  
149 by 1:1 using nearest neighbor matching method with a caliper width of 0.05, and the histogram of the  
150 propensity score distribution was draw, which was carried out through the Stata software. Then, K-M  
151 curves were depicted and Cox regression analysis was conducted in the matching cohort after PSM,  
152 which further validated SII as an independent risk factor for poor prognosis in the critically ill  
153 patients with CHF.

154 The statistical analysis above was conducted by EmpowerStats software (version 2.20,  
155 <http://www.empowerstats.com/cn/>, X&Y solutions, Inc, Boston, MA) and R software (version 3.4.3).  
156  $p < 0.05$  (two-sided) was considered statistically significant.

## 157 **3 Results**

### 158 **3.1 Clinical Characteristics of Study Subjects**

159 The study subjects were screened according to the process shown in Figure 1, and 4604 subjects were  
160 finally included. The demographic data, vital signs, comorbidities, treatment, scores and laboratory  
161 examinations and other relevant information are shown in Table 1 in detail. In general, the study  
162 subjects included were a little old, with a median age of 74.91 years old, mainly male patients,  
163 reaching 2436, accounting for 52.89%. And the majority of the subjects were whites, accounting for

164 72.71%, blacks only 7.21%, and other races including Asians accounted for 20.08%. The duration of  
165 follow-up was 90 days, of which 3226 survived and 1380 died due to various reasons before the end  
166 of the study. SII (213.97 vs 163.11,  $p < 0.001$ ) was significantly higher in the non-survivor cohort.  
167 Compared with the survivor group, older patients were identified more frequently in the non-survivor  
168 group, with more unstable vital signs, higher incidence of comorbidities such as VHD, atrial  
169 fibrillation, and renal failure, as well as higher SOFA and SAPSII scores.

### 170 **3.2 SII Distinguishing a Poor Short-term Prognosis**

171 GAM analysis was used to identify the non-linear correlation between SII and the short-term all-  
172 cause mortality of patients, which showed that there was a U-shaped curve relationship between SII  
173 and 30-day (Figure 2A) and 90-day (Figure 2B) all-cause mortality in critically ill patients with CHF,  
174 indicating that higher or lower SII may be associated with increased mortality. The K-M survival  
175 curve (Figure 3) also showed that compared with the low SII group, patients with high SII level had a  
176 lower overall survival rate and shorter survival time, with a statistically significant  $p$  value.

177 In order to verify the independent relationship between SII and the poor short-term mortality of CHF  
178 patients, we performed the univariate and multivariate Cox regression analysis (Table 2), with SII  
179 stratified by tertiles. In crude model, the third tertile of SII increased significantly the risk of 30- (HR,  
180 95% CI: 1.73, 1.48-2.03) and 90-day (HR, 95% CI: 1.65, 1.45-1.88) and hospital (HR, 95% CI: 1.61,  
181 1.36-1.91) all-cause mortalities compared with the first tertile. In multivariate model I, after adjusting  
182 for age, sex, and ethnicity, the third tertile of SII group also suffered from the higher risk of 30- (HR,  
183 95% CI: 1.63, 1.40-1.91) and 90-day (HR, 95% CI: 1.57, 1.38-1.79) and hospital (HR, 95% CI: 1.45,  
184 1.22-1.72) all-cause mortalities. In model II, in addition to adjusting for the variables in model I and  
185 other possible confounders such as pneumonia, the use of dialysis, and BUN level, high levels of SII  
186 were still strongly associated with poor 30- (HR, 95% CI: 1.23, 1.04-1.45) and 90-day (HR, 95% CI:  
187 1.21, 1.06-1.39) and hospital (HR, 95% CI: 1.26, 1.05-1.50) all-cause mortalities.

### 188 **3.3 Association between SII and readmission and MACEs**

189 For MACEs, a similar trend was observed. In model II (Table 3), patients with an  $SII \geq 2730.11$  were  
190 still at higher incidence of MACEs (OR, 95% CI: 1.39, 1.12-1.73). However, in the multivariate  
191 regression analysis, there was no obvious independent correlation between SII and readmission rate  
192 in the critically ill patients with CHF (tertile 3 versus tertile 1: OR, 95% CI: 0.97, 0.81-1.15).

### 193 **3.4 Subgroup analyses**

194 The subgroup analysis was conducted to reveal the correlation between SII and 30-day mortality  
195 across comorbidities and different parameters, and the results were shown in Table 4. First, the  
196 results of the study showed that in all subgroups, the increase in SII level was closely related to the  
197 increase in the 30-day all-cause mortality of critically ill patients with CHF. Besides, most of the  
198 stratification factors have not been found to have a significant impact on the relationship between the  
199 SII and 30-day all-cause mortality in critically (interaction  $p$  value  $> 0.05$ ), except for hyperlipemia  
200 ( $p = 0.006$ ) and AMI ( $p = 0.016$ ). The above results indicated that SII has good robustness as a marker  
201 for poor prognosis of CHF.

### 202 **3.5 Prognostic value of SII after PSM**

203 Determine the optimal cut-off value of SII for 90-day all-cause mortality of critically ill patients with  
204 CHF through X-tile software, which is 5533.4. Subjects were divided into two groups according to

205 the cut-off value, and their clinical characteristics were summarized in Table 5, most of which were  
206 unevenly distributed across the two groups. In order to effectively balance these confounding factors  
207 and improve the credibility of our results, we conducted a PSM analysis with 1:1 matching. After  
208 PSM, 602 pairs of research objects were generated and the difference of almost all variables were  
209 balanced between the two groups, with a good matching performance (Figure 4). At the same time,  
210 after PSM, compared with the low SII level group, subjects in the high SII level group still  
211 underwent higher 30- (24.9% vs 33.2%,  $p=0.002$ ) and 90-day (35.0% vs 42.0%,  $p=0.013$ ) and  
212 hospital (22.4% vs 27.7%,  $p=0.033$ ) all-cause mortality, with shorter survival time (Table 5 and  
213 Figure 5). Besides, after adjusting for these covariable in the model II, the increased SII was also  
214 associated with increased risk of short-term all-cause mortality in critically ill patients with CHF after  
215 PSM and the results were shown in Figure 6 in the form of a forest map.

## 216 **4 Discussion**

217 CHF is widespread all over the world, with gradually increasing incidence with age, and has become  
218 one of the diseases with the highest rates of hospitalizations and deaths in the world, bringing about  
219 enormous medical expenditure and social burden, especially in developing countries<sup>16</sup>. In addition to  
220 exploring promising treatments, the development of novel prognostic markers for risk stratification  
221 of patients is also of great value for improving the prognosis of patients. As we all know, as a  
222 commonly used indicator of heart failure, NT-proBNP can make a good performance in prognostic  
223 evaluation. However, the clinical applications of NT-proBNP for risk assessment has some  
224 drawbacks and problems. First, compared to the real value, the detection of NT-proBNP tend to be  
225 underestimated because of the short half-life. Moreover, the test of NT-proBNP may be affected by  
226 various factors such as age, gender, and kits<sup>17</sup>. Therefore, the search for more possible biomarkers  
227 has gradually attracted the attention of researchers and clinicians.

228 In the present study, we extracted the clinical data of 4604 critically ill patients who diagnosed with  
229 CHF between 2003 and 2010 in MIMIC-III database, and analyzed the relationship between SII and  
230 short-term prognosis by univariate and multivariate regression analyses for the first time. And the  
231 results have verified that SII could be an independent biomarker for poor short-term prognosis of  
232 CHF. There was a nonlinear relationship between SII and 30- and 90-day mortalities. And the higher  
233 SII level, the higher risk of 30- and 90-day and hospital mortalities, as well as the higher incidence of  
234 MACEs. The correlation remained significant after adjusting for possible confounders, stratifying  
235 according to comorbidities, and PSM matching, respectively.

236 Inflammation, a widely accepted hallmark of heart failure, has been proven to play an indispensable  
237 role in the pathogenesis of heart failure<sup>18</sup>. The increase and activation of inflammation-related  
238 cytokines not only present a reflection of the activation of inflammation in vivo, but have also been  
239 identified as being associated with poor prognosis in heart failure. Tumor necrosis factor  $\alpha$  (TNF- $\alpha$ )  
240 was the first cytokine found to be significantly elevated in the serum of patients with heart failure,  
241 which could directly induce myocardial apoptosis and necrosis, bringing about ventricular adverse  
242 remodeling<sup>19</sup>. The elevated levels of TNF- $\alpha$  often indicated impaired cardiac systolic function and  
243 poor long-term survival<sup>20</sup>. In addition, interleukin 6 (IL-6), another classic cytokine mainly derived  
244 from monocytes, could be significantly increased in patients with left ventricular systolic dysfunction  
245 without clinical symptoms, and may be a sensitive indicator for the early diagnosis of heart failure<sup>21</sup>.  
246 IL-6 was also positively correlated with the severity of heart failure, the concentration of which was  
247 negatively correlated with left ventricular ejection fraction and overall survival<sup>22</sup>. Although these  
248 inflammatory molecules had good performance in the prognostic evaluation of patients, the  
249 expensive detection cost limited their clinical application. As a novel biomarker, SII can

250 systematically and comprehensively reflect the status of inflammation in vivo. Blood routine is a  
251 routine examination for almost all hospitalized patients. It is simple, fast, and inexpensive. Compared  
252 with NT-proBNP, cytokines and other prognostic indicators, SII can effectively screen high-risk  
253 patients, guide the formulation of individualized treatment plans and improve the prognosis of  
254 patients without additional cost, with a broad application prospect, especially in underdeveloped  
255 areas.

256 The mechanisms of the relationship between SII and adverse prognosis of CHF remains unclear, and  
257 possible explanations are as follows. Recently, it has been revealed that circulating immune cells and  
258 their subtypes had a vital indicative effect on the prognosis of cardiovascular diseases<sup>23</sup>. SII was a  
259 prognostic indicator that integrates three circulating immune cells, including neutrophils,  
260 lymphocytes, and platelets, the increase of which indicates either a relative increase in platelets and  
261 neutrophils counts or a relative decrease in lymphocytes. Neutrophils are the main component of  
262 white blood cells, accounting for 60-70% of the total, and play an important role in the non-specific  
263 immune system. In the inflammatory response, neutrophils react rapidly, with strong chemotaxis and  
264 phagocytosis, and participate in the progression of various cardiovascular diseases, including heart  
265 failure<sup>24</sup>. In addition, neutrophils could contribute to oxidative stress and endothelial dysfunction by  
266 releasing a large amount of myeloperoxidase, NADPH oxidase, and so on<sup>25</sup>. According to a  
267 community-based study<sup>26</sup>, absolute neutrophils can effectively predict the increased incidence of  
268 acute decompensated heart failure after acute myocardial infarction, and it was also an independent  
269 risk factor for death<sup>27</sup>. Lymphocytes mainly consist of two subtype including T and B cells, which  
270 were often associated with the specific immunity. Several previous studies have reported that  
271 lymphocyte counts in patients with heart failure were lower than in the normal population and  
272 lymphopenia served as an independent predictor of poor survival of patients with chronic and  
273 advanced heart failure<sup>28,29</sup>. Lymphopenia was considered to be an important feature of systemic  
274 inflammation, which may be caused by the following mechanisms. First, the circulating lymphocytes  
275 were attracted into the cardiac tissue, leading to its redistribution. Then, lymphopenia was related to  
276 the activation of renin-angiotensin-aldosterone hormone and the adrenergic nervous system, which  
277 could exert pro-apoptotic effects on lymphocytes<sup>29</sup>. Platelets were differentiated from the  
278 mononuclear-phagocyte system and were the key mediator linking the two pathological processes of  
279 inflammation and thrombosis<sup>30</sup>. On the one hand, platelets were the main effector molecules for  
280 hemostasis after cardiovascular injury. On the other hand, the activation of platelets plays a major  
281 role in pathogenic thrombosis and participates in the pathogenesis of many groups of cardiovascular  
282 diseases, including coronary heart disease<sup>31</sup>. Moreover, Platelets interacted with leukocytes and their  
283 subtypes (neutrophil, lymphocytes, etc.) and endothelial cells and activated them, inducing monocyte  
284 adhesion and transport, releasing inflammatory factors such as TNF- $\alpha$  and IL-1, which together  
285 promoted local inflammation and fibrosis in heart failure<sup>31</sup>. The study by Kandis<sup>32</sup> et al. demonstrated  
286 that mean platelet volume (MPV), indicating the activation of platelets, increased significantly in  
287 decompensated heart failure patients. In addition, MPV at admission was independently associated  
288 with the hospital and 6-month mortalities.

289 But at the same time, there were certain limitations in this study. First, the present study was  
290 conducted at a single center and did not validate the prognostic value of SII in a validation cohort.  
291 Second, the clinical data were collected retrospectively from databases and it was difficult to ensure  
292 that variables were evenly distributed across groups, although multiple regression models were  
293 conducted to adjust for confounders and PSM analysis was used to minimize inter-group differences  
294 in baseline characteristics. Third, some significant variables may be omissive due to the lack of data.  
295 Last, this study was unable to determine the underlying mechanism of the association between high  
296 SII and poor prognosis of CHF patients, and further experiments are necessary.

## 297 **5 Conclusion**

298 In summary, the high level of SII is closely related to the poor short-term prognosis in critically ill  
299 patients with CHF, including 30- and 90-day and hospital all-cause mortality, as well as the  
300 occurrence of MACEs, and is expected to be a simple and effective prognostic evaluation indicator.

## 301 **6 Conflict of Interest**

302 All authors declare that there is no conflict of interest.

## 303 **7 Author Contributions**

304 Zaixin Yu and Lihuang Zha are the senior author who conceived and designed the study. Yiyang  
305 Tang and Qin Chen collected and analyzed the clinical data. Yiyang Tang drafted the manuscript.  
306 Yilu Feng and Xiaofang Zeng participated in the implementation of statistical methods in this study  
307 and put forward constructive suggestions. Zhenghui Liu and Hui Luo reviewed the study and  
308 participated in the interpretation of the results. All authors gave final approval of the version to be  
309 published, and agree to be accountable for all aspects of the work.

## 310 **8 Funding**

311 Our study was supported by the National Natural Science Foundation of China (81873416), the Key  
312 Research and Development Program of Hunan Province (2020SK2065) and Natural Science  
313 Foundation Project of Hunan Province (2020JJ4634).

## 314 **9 Data availability**

315 Publicly available datasets were analyzed in this study. This data can be extracted from Monitoring in  
316 Intensive Care Database III version 1.4 (MIMIC-III v.1.4) after passing on the required courses and  
317 obtaining the authorization.

## 318 **Reference styles**

- 319 1. Sun D, Zhang F, Ma T, Zhang Y, Liang Z. Atorvastatin alleviates left ventricular remodeling  
320 in isoproterenol-induced chronic heart failure in rats by regulating the RhoA/Rho kinase  
321 signaling pathway. *Pharmacol Rep.* 2020;72(4):903-911.
- 322 2. Povsic TJ. Emerging Therapies for Congestive Heart Failure. *Clin Pharmacol Ther.*  
323 2018;103(1):77-87.
- 324 3. Chen J, Normand SL, Wang Y, Krumholz HM. National and regional trends in heart failure  
325 hospitalization and mortality rates for Medicare beneficiaries, 1998-2008. *JAMA.*  
326 2011;306(15):1669-1678.
- 327 4. Xu M, Zhang L, Song S, et al. Hydrogen sulfide: Recent progress and perspectives for the  
328 treatment of dermatological diseases. *J Adv Res.* 2021;27:11-17.
- 329 5. Li H, Chen C, Wang DW. Inflammatory Cytokines, Immune Cells, and Organ Interactions in  
330 Heart Failure. *Front Physiol.* 2021;12:695047.
- 331 6. Bradham WS, Bozkurt B, Gunasinghe H, Mann D, Spinale FG. Tumor necrosis factor-alpha  
332 and myocardial remodeling in progression of heart failure: a current perspective. *Cardiovasc*  
333 *Res.* 2002;53(4):822-830.



- 334 7. Mann DL. Innate immunity and the failing heart: the cytokine hypothesis revisited. *Circ Res.*  
335 2015;116(7):1254-1268.
- 336 8. Wang BL, Tian L, Gao XH, et al. Dynamic change of the systemic immune inflammation  
337 index predicts the prognosis of patients with hepatocellular carcinoma after curative resection.  
338 *Clin Chem Lab Med.* 2016;54(12):1963-1969.
- 339 9. Yang YL, Wu CH, Hsu PF, et al. Systemic immune-inflammation index (SII) predicted  
340 clinical outcome in patients with coronary artery disease. *Eur J Clin Invest.*  
341 2020;50(5):e13230.
- 342 10. Tosu AR, Kalyoncuoglu M, Biter HI, et al. Prognostic Value of Systemic Immune-  
343 Inflammation Index for Major Adverse Cardiac Events and Mortality in Severe Aortic  
344 Stenosis Patients after TAVI. *Medicina (Kaunas).* 2021;57(6).
- 345 11. Agus HZ, Kahraman S, Arslan C, et al. Systemic immune-inflammation index predicts  
346 mortality in infective endocarditis. *J Saudi Heart Assoc.* 2020;32(1):58-64.
- 347 12. Johnson AE, Pollard TJ, Shen L, et al. MIMIC-III, a freely accessible critical care database.  
348 *Sci Data.* 2016;3:160035.
- 349 13. Li W, Huang A, Zhu H, et al. Gut microbiota-derived trimethylamine N-oxide is associated  
350 with poor prognosis in patients with heart failure. *Med J Aust.* 2020;213(8):374-379.
- 351 14. Hu B, Yang XR, Xu Y, et al. Systemic immune-inflammation index predicts prognosis of  
352 patients after curative resection for hepatocellular carcinoma. *Clin Cancer Res.*  
353 2014;20(23):6212-6222.
- 354 15. Jaddoe VW, de Jonge LL, Hofman A, Franco OH, Steegers EA, Gaillard R. First trimester  
355 fetal growth restriction and cardiovascular risk factors in school age children: population  
356 based cohort study. *BMJ.* 2014;348:g14.
- 357 16. Savarese G, Lund LH. Global Public Health Burden of Heart Failure. *Card Fail Rev.*  
358 2017;3(1):7-11.
- 359 17. Cho JH, Cho HJ, Lee HY, et al. Neutrophil-Lymphocyte Ratio in Patients with Acute Heart  
360 Failure Predicts In-Hospital and Long-Term Mortality. *J Clin Med.* 2020;9(2).
- 361 18. Dick SA, Epelman S. Chronic Heart Failure and Inflammation: What Do We Really Know?  
362 *Circ Res.* 2016;119(1):159-176.
- 363 19. Anker SD, von Haehling S. Inflammatory mediators in chronic heart failure: an overview.  
364 *Heart.* 2004;90(4):464-470.
- 365 20. Rauchhaus M, Doehner W, Francis DP, et al. Plasma cytokine parameters and mortality in  
366 patients with chronic heart failure. *Circulation.* 2000;102(25):3060-3067.
- 367 21. Plenz G, Song ZF, Tjan TD, et al. Activation of the cardiac interleukin-6 system in advanced  
368 heart failure. *Eur J Heart Fail.* 2001;3(4):415-421.
- 369 22. Markousis-Mavrogenis G, Tromp J, Ouwerkerk W, et al. The clinical significance of  
370 interleukin-6 in heart failure: results from the BIOSTAT-CHF study. *Eur J Heart Fail.*  
371 2019;21(8):965-973.
- 372 23. Strassheim D, Dempsey EC, Gerasimovskaya E, Stenmark K, Karoor V. Role of  
373 Inflammatory Cell Subtypes in Heart Failure. *J Immunol Res.* 2019;2019:2164017.

- 374 24. Bonaventura A, Montecucco F, Dallegri F, et al. Novel findings in neutrophil biology and  
375 their impact on cardiovascular disease. *Cardiovasc Res.* 2019;115(8):1266-1285.
- 376 25. Swirski FK, Nahrendorf M. Leukocyte behavior in atherosclerosis, myocardial infarction, and  
377 heart failure. *Science.* 2013;339(6116):161-166.
- 378 26. Arruda-Olson AM, Reeder GS, Bell MR, Weston SA, Roger VL. Neutrophilia predicts death  
379 and heart failure after myocardial infarction: a community-based study. *Circ Cardiovasc Qual*  
380 *Outcomes.* 2009;2(6):656-662.
- 381 27. Uthamalingam S, Patvardhan EA, Subramanian S, et al. Utility of the neutrophil to  
382 lymphocyte ratio in predicting long-term outcomes in acute decompensated heart failure. *Am*  
383 *J Cardiol.* 2011;107(3):433-438.
- 384 28. Vaduganathan M, Ambrosy AP, Greene SJ, et al. Predictive value of low relative lymphocyte  
385 count in patients hospitalized for heart failure with reduced ejection fraction: insights from  
386 the EVEREST trial. *Circ Heart Fail.* 2012;5(6):750-758.
- 387 29. Charach G, Grosskopf I, Roth A, et al. Usefulness of total lymphocyte count as predictor of  
388 outcome in patients with chronic heart failure. *Am J Cardiol.* 2011;107(9):1353-1356.
- 389 30. Ye GL, Chen Q, Chen X, et al. The prognostic role of platelet-to-lymphocyte ratio in patients  
390 with acute heart failure: A cohort study. *Sci Rep.* 2019;9(1):10639.
- 391 31. Glezeva N, Gilmer JF, Watson CJ, Ledwidge M. A Central Role for Monocyte-Platelet  
392 Interactions in Heart Failure. *J Cardiovasc Pharmacol Ther.* 2016;21(3):245-261.
- 393 32. Kandis H, Ozhan H, Ordu S, et al. The prognostic value of mean platelet volume in  
394 decompensated heart failure. *Emerg Med J.* 2011;28(7):575-578.

395

396

397

398

399

400

401

402

403

404

405

406

407

408 **Table 1.** The baseline clinical characteristics of critically ill patients with CHF.

| <b>Parameter</b>        | <b>All(n=4606)</b>     | <b>Survivors<br/>(n=3226)</b> | <b>Non-survivors<br/>(n=1380)</b> | <b><i>p</i><br/>value</b> |
|-------------------------|------------------------|-------------------------------|-----------------------------------|---------------------------|
| <b>Demographics</b>     |                        |                               |                                   |                           |
| Age, years              | 74.91 (64.06-83.07)    | 72.70 (61.97-81.65)           | 78.94 (69.40-84.82)               | <0.001                    |
| Male, n (%)             | 2436 (52.89%)          | 1690 (52.39%)                 | 746 (54.06%)                      | 0.298                     |
| Ethnicity, n (%)        |                        |                               |                                   | <0.001                    |
| White                   | 3349 (72.71%)          | 2361 (73.19%)                 | 988 (71.59%)                      |                           |
| Black                   | 332 (7.21%)            | 254 (7.87%)                   | 78 (5.65%)                        |                           |
| Others                  | 925 (20.08%)           | 611 (18.94%)                  | 314 (22.75%)                      |                           |
| <b>Vital signs</b>      |                        |                               |                                   |                           |
| HR, beats/minute        | 85.02 (74.53-96.54)    | 84.33 (74.33-95.77)           | 86.67 (75.24-98.65)               | <0.001                    |
| RR, times/minute        | 19.42 (16.87-22.38)    | 19.17 (16.76-21.91)           | 20.03 (17.24-23.45)               | <0.001                    |
| SBP, mmHg               | 113.64 (104.46-125.96) | 114.89 (105.50-126.98)        | 111.04 (101.60-123.48)            | <0.001                    |
| DBP, mmHg               | 56.93 (50.87-63.71)    | 57.85 (51.64-64.34)           | 55.10 (49.46-61.64)               | <0.001                    |
| Temperature, °C         | 36.76 (36.37-37.21)    | 36.80 (36.42-37.22)           | 36.65 (36.26-37.13)               | <0.001                    |
| SpO <sub>2</sub> , %    | 97.23 (95.74-98.46)    | 97.25 (95.81-98.49)           | 97.19 (95.52-98.40)               | 0.018                     |
| Weight, kg              | 77.75 (64.70-93.60)    | 79.80 (65.60-96.00)           | 73.80 (62.00-88.00)               | <0.001                    |
| <b>Therapies, n (%)</b> |                        |                               |                                   |                           |
| ACEI                    | 1266 (27.49%)          | 1012 (31.37%)                 | 254 (18.41%)                      | <0.001                    |
| ARB                     | 183 (3.97%)            | 151 (4.68%)                   | 32 (2.32%)                        | <0.001                    |
| β-blocker               | 2827 (61.38%)          | 2074 (64.29%)                 | 753 (54.57%)                      | <0.001                    |
| Digoxin                 | 475 (10.31%)           | 303 (9.39%)                   | 172 (12.46%)                      | 0.002                     |
| Furosemide              | 3190 (69.26%)          | 2275 (70.52%)                 | 915 (66.30%)                      | 0.004                     |
| Statins                 | 1451 (31.50%)          | 1121 (34.75%)                 | 330 (23.91%)                      | <0.001                    |
| Dialysis                | 478 (10.38%)           | 278 (8.62%)                   | 200 (14.49%)                      | <0.001                    |
| Vasopressor             | 1234 (26.79%)          | 727 (22.54%)                  | 507 (36.74%)                      | <0.001                    |
| Ventilation             | 1879 (40.79%)          | 1133 (35.12%)                 | 746 (54.06%)                      | <0.001                    |
| Assisted circulation    | 282 (6.12%)            | 186 (5.77%)                   | 96 (6.96%)                        | 0.123                     |

409 **Table 1.** Continued.

| <b>Parameter</b>            | <b>All(n=4606)</b>     | <b>Survivors<br/>(n=3226)</b> | <b>Non-survivors<br/>(n=1380)</b> | <b>p<br/>value</b> |
|-----------------------------|------------------------|-------------------------------|-----------------------------------|--------------------|
| <b>Laboratory events</b>    |                        |                               |                                   |                    |
| Hemoglobin, g/dl            | 10.90 (9.70-12.30)     | 11.10 (9.80-12.50)            | 10.70 (9.40-11.90)                | <0.001             |
| Creatinine, mg/dl           | 1.20 (0.90-1.80)       | 1.20 (0.90-1.70)              | 1.30 (0.90-2.10)                  | <0.001             |
| BUN, mg/dl                  | 27.00 (18.00-43.00)    | 25.00 (17.00-40.00)           | 33.00 (21.00-51.00)               | <0.001             |
| Glucose, mg/dl              | 135.33 (115.00-166.12) | 134.23 (115.47-164.03)        | 137.71 (114.36-170.52)            | 0.111              |
| Sodium, mmol/L              | 139.00 (136.00-141.00) | 139.00 (136.00-141.00)        | 138.00 (135.00-141.00)            | 0.023              |
| Potassium, mmol/L           | 4.20 (3.80-4.60)       | 4.10 (3.70-4.60)              | 4.20 (3.80-4.70)                  | 0.002              |
| Chloride, mmol/L            | 103.00 (99.00-107.00)  | 103.00 (99.25-107.00)         | 103.00 (99.00-107.00)             | 0.035              |
| Bicarbonate, mmol/L         | 24.00 (21.00-28.00)    | 25.00 (22.00-28.00)           | 24.00 (20.00-27.00)               | <0.001             |
| PT, second                  | 14.30 (13.20-16.80)    | 14.20 (13.10-16.50)           | 14.80 (13.40-17.90)               | <0.001             |
| APTT, second                | 31.80 (27.30-40.40)    | 31.30 (27.10-40.20)           | 32.70 (27.87-41.10)               | 0.001              |
| Lactate, mmol/L             | 1.82 (1.30-2.90)       | 1.80 (1.20-2.83)              | 2.00 (1.30-3.00)                  | <0.001             |
| Albumin, g/dL               | 3.00 (2.56-3.40)       | 3.00 (2.60-3.42)              | 2.89 (2.45-3.24)                  | <0.001             |
| Bilirubin, mg/dL            | 1.40 (0.60-3.05)       | 1.40 (0.60-3.00)              | 1.41 (0.60-3.10)                  | 0.339              |
| ALT, IU/L                   | 60.00 (22.00-298.33)   | 69.00 (23.92-327.15)          | 45.00 (19.00-207.75)              | <0.001             |
| NT-proBNP, ng/ml            | 10.98 (4.67-18.83)     | 10.70 (4.26-18.34)            | 11.91 (5.67-19.96)                | <0.001             |
| cTnT, ng/mL                 | 1.34 (0.10-2.87)       | 1.46 (0.11-2.94)              | 1.12 (0.09-2.58)                  | <0.001             |
| CI, L/min/m <sup>2</sup>    | 2.76 (2.13-3.47)       | 2.75 (2.13-3.48)              | 2.78 (2.14-3.45)                  | 0.626              |
| Urine output, L             | 1.54 (0.89-2.44)       | 1.73 (1.02-2.65)              | 1.14 (0.67-1.87)                  | <0.001             |
| SII ×10                     | 174.76 (92.24-344.55)  | 163.11 (88.62-309.02)         | 213.97 (105.80-430.34)            | <0.001             |
| <b>Hospitalization type</b> |                        |                               |                                   | <0.001             |
| Emergency, n (%)            | 4062 (88.19%)          | 2804 (86.92%)                 | 1258 (91.16%)                     |                    |
| Elective, n (%)             | 367 (7.97%)            | 300 (9.30%)                   | 67 (4.86%)                        |                    |
| <b>First ICU admission</b>  |                        |                               |                                   | <0.001             |
| CCU, n (%)                  | 1236 (26.83%)          | 898 (27.84%)                  | 338 (24.49%)                      |                    |
| MICU, n (%)                 | 2005 (43.53%)          | 1308 (40.55%)                 | 697 (50.51%)                      |                    |

410 **Table 1.** Continued.

| <b>Parameter</b>             | <b>All(n=4606)</b>          | <b>Survivors<br/>(n=3226)</b> | <b>Non-survivors<br/>(n=1380)</b> | <b>p<br/>value</b> |
|------------------------------|-----------------------------|-------------------------------|-----------------------------------|--------------------|
| <b>Comorbidities, n (%)</b>  |                             |                               |                                   |                    |
| Hypertension                 | 937 (20.34%)                | 655 (20.30%)                  | 282 (20.43%)                      | 0.919              |
| Hyperlipemia                 | 1260 (27.36%)               | 975 (30.22%)                  | 285 (20.65%)                      | <0.001             |
| Diabetes mellitus            | 1657 (35.97%)               | 1218 (37.76%)                 | 439 (31.81%)                      | <0.001             |
| Atrial fibrillation          | 2077 (45.09%)               | 1361 (42.19%)                 | 716 (51.88%)                      | <0.001             |
| AMI                          | 346 (7.51%)                 | 241 (7.47%)                   | 105 (7.61%)                       | 0.871              |
| VHD                          | 463 (10.05%)                | 289 (8.96%)                   | 174 (12.61%)                      | <0.001             |
| Peripheral vascular          | 577 (12.53%)                | 397 (12.31%)                  | 180 (13.04%)                      | 0.489              |
| Pulmonary circulation        | 292 (6.34%)                 | 183 (5.67%)                   | 109 (7.90%)                       | 0.005              |
| Pneumonia                    | 1350 (29.31%)               | 858 (26.60%)                  | 492 (35.65%)                      | <0.001             |
| COPD                         | 245 (5.32%)                 | 156 (4.84%)                   | 89 (6.45%)                        | 0.025              |
| Liver diseases               | 232 (5.04%)                 | 138 (4.28%)                   | 94 (6.81%)                        | <0.001             |
| Renal failure                | 1120 (24.32%)               | 757 (23.47%)                  | 363 (26.30%)                      | 0.040              |
| Stroke                       | 250 (5.43%)                 | 148 (4.59%)                   | 102 (7.39%)                       | <0.001             |
| Hypothyroidism               | 555 (12.05%)                | 392 (12.15%)                  | 163 (11.81%)                      | 0.746              |
| Malignancy                   | 253 (5.49%)                 | 128 (3.97%)                   | 125 (9.06%)                       | <0.001             |
| Depression                   | 359 (7.79%)                 | 276 (8.56%)                   | 83 (6.01%)                        | 0.003              |
| <b>Scores</b>                |                             |                               |                                   |                    |
| SOFA                         | 5.00 (3.00-7.00)            | 4.00 (3.00-6.00)              | 6.00 (4.00-8.00)                  | <0.001             |
| SAPSII                       | 40.00 (32.00-49.00)         | 38.00 (30.00-46.00)           | 47.00 (39.00-56.00)               | <0.001             |
| <b>Length of ICU stay, h</b> | <b>94.00 (50.00-187.00)</b> | <b>88.00 (48.00-166.75)</b>   | <b>122.00 (62.00-240.25)</b>      | <b>&lt;0.001</b>   |

411

412

413

414

415

416 **Table 2.** The univariate and multivariate Cox regression analysis exploring the association of SII  
 417 tertile with short-term mortality of critically ill patients with CHF.

|                              | Crude             |         | Model I           |         | Model II          |         |
|------------------------------|-------------------|---------|-------------------|---------|-------------------|---------|
|                              | HR (95% CIs)      | P value | HR (95% CIs)      | P value | HR (95% CIs)      | P value |
| 30-day all-cause mortality   |                   |         |                   |         |                   |         |
| SII                          | 1.00 (1.00, 1.00) | <0.001  | 1.00 (1.00, 1.00) | <0.0001 | 1.00 (1.00, 1.00) | <0.0001 |
| SII (tertile)                |                   |         |                   |         |                   |         |
| <1144.28                     | 1 (ref)           |         | 1 (ref)           |         | 1 (ref)           |         |
| ≥1144.28, <2730.11           | 1.17 (0.99, 1.38) | 0.067   | 1.14 (0.97, 1.35) | 0.112   | 1.05 (0.89, 1.25) | 0.524   |
| ≥2730.11                     | 1.73 (1.48, 2.03) | <0.001  | 1.63 (1.40, 1.91) | <0.001  | 1.23 (1.04, 1.45) | 0.011   |
| P for trend                  | <0.001            |         | <0.001            |         | <0.001            |         |
| 90-day all-cause mortality   |                   |         |                   |         |                   |         |
| SII                          | 1.00 (1.00, 1.00) | <0.001  | 1.00 (1.00, 1.00) | <0.0001 | 1.00 (1.00, 1.00) | 0.001   |
| SII (tertile)                |                   |         |                   |         |                   |         |
| <1144.28                     | 1 (ref)           |         | 1 (ref)           |         | 1 (ref)           |         |
| ≥1144.28, <2730.11           | 1.12 (0.97, 1.28) | 0.114   | 1.10 (0.96, 1.27) | 0.168   | 1.02 (0.88, 1.17) | 0.820   |
| ≥2730.11                     | 1.65 (1.45, 1.88) | <0.001  | 1.57 (1.38, 1.79) | <0.001  | 1.21 (1.06, 1.39) | 0.005   |
| P for trend                  | <0.001            |         | <0.001            |         | <0.001            |         |
| Hospital all-cause mortality |                   |         |                   |         |                   |         |
| SII                          | 1.00 (1.00, 1.00) | <0.001  | 1.00 (1.00, 1.00) | <0.0001 | 1.00 (1.00, 1.00) | 0.002   |
| SII (tertile)                |                   |         |                   |         |                   |         |
| <1144.28                     | 1 (ref)           |         | 1 (ref)           |         | 1 (ref)           |         |
| ≥1144.28, <2730.11           | 1.27 (1.06, 1.52) | 0.008   | 1.21 (1.01, 1.45) | 0.035   | 1.17 (0.97, 1.40) | 0.096   |
| ≥2730.11                     | 1.61 (1.36, 1.91) | <0.001  | 1.45 (1.22, 1.72) | <0.001  | 1.26 (1.05, 1.50) | 0.011   |
| P for trend                  | <0.001            |         | <0.001            |         | <0.001            |         |

418

419

420

421 **Table 3.** The univariate and multivariate Logistic regression analysis exploring the association of SII  
 422 tertile with readmission and MACEs of critically ill patients with CHF.

|                    | Crude             |         | Model I           |         | Model II          |         |
|--------------------|-------------------|---------|-------------------|---------|-------------------|---------|
|                    | OR (95% CIs)      | P value | OR (95% CIs)      | P value | OR (95% CIs)      | P value |
| Readmission        |                   |         |                   |         |                   |         |
| SII (tertile)      |                   |         |                   |         |                   |         |
| <1144.28           | 1 (ref)           |         | 1 (ref)           |         | 1 (ref)           |         |
| ≥1144.28, <2730.11 | 0.91 (0.77, 1.07) | 0.253   | 0.94 (0.80, 1.11) | 0.472   | 0.94 (0.80, 1.11) | 0.484   |
| ≥2730.11           | 0.88 (0.75, 1.04) | 0.129   | 0.93 (0.78, 1.10) | 0.392   | 0.97 (0.81, 1.15) | 0.703   |
| P for trend        | <0.001            |         | <0.001            |         | <0.001            |         |
| MACEs              |                   |         |                   |         |                   |         |
| SII (tertile)      |                   |         |                   |         |                   |         |
| <1144.28           | 1 (ref)           |         | 1 (ref)           |         | 1 (ref)           |         |
| ≥1144.28, <2730.11 | 1.17 (1.02, 1.35) | 0.030   | 1.17 (1.02, 1.35) | 0.028   | 0.92 (0.74, 1.13) | 0.417   |
| ≥2730.11           | 2.01 (1.73, 2.32) | <0.001  | 2.02 (1.74, 2.35) | <0.001  | 1.39 (1.12, 1.73) | 0.003   |
| P for trend        | <0.001            |         | <0.001            |         | <0.001            |         |

423

424

425

426

427

428

429

430

431

432

433

434

435 **Table 4.** Subgroup analysis of the relationship between SII and 30-day all-cause mortality.

|                            | N    | SII       |                    |                   | P for interaction |
|----------------------------|------|-----------|--------------------|-------------------|-------------------|
|                            |      | <1144.28  | ≥1144.28, <2730.11 | ≥2730.11          |                   |
| <b>Hypertension</b>        |      |           |                    |                   |                   |
| No                         | 3669 | 1.0 (ref) | 1.09 (0.90, 1.31)  | 1.70 (1.44, 2.02) | 0.178             |
| Yes                        | 937  | 1.0 (ref) | 1.57 (1.07, 2.31)  | 1.88 (1.28, 2.76) |                   |
| <b>Diabetes</b>            |      |           |                    |                   |                   |
| No                         | 2949 | 1.0 (ref) | 1.16 (0.95, 1.42)  | 1.62 (1.34, 1.95) | 0.384             |
| Yes                        | 1657 | 1.0 (ref) | 1.22 (0.90, 1.65)  | 2.01 (1.52, 2.67) |                   |
| <b>Hyperlipemia</b>        |      |           |                    |                   |                   |
| No                         | 3346 | 1.0 (ref) | 1.13 (0.94, 1.36)  | 1.51 (1.27, 1.80) | 0.006             |
| Yes                        | 1260 | 1.0 (ref) | 1.40 (0.96, 2.05)  | 2.77 (1.94, 3.96) |                   |
| <b>AMI</b>                 |      |           |                    |                   |                   |
| No                         | 4260 | 1.0 (ref) | 1.09 (0.92, 1.30)  | 1.71 (1.46, 2.01) | 0.016             |
| Yes                        | 346  | 1.0 (ref) | 2.63 (1.30, 5.30)  | 2.31 (1.14, 4.69) |                   |
| <b>VHD</b>                 |      |           |                    |                   |                   |
| No                         | 4143 | 1.0 (ref) | 1.15 (0.96, 1.38)  | 1.76 (1.49, 2.07) | 0.602             |
| Yes                        | 463  | 1.0 (ref) | 1.23 (0.76, 2.00)  | 1.50 (0.94, 2.41) |                   |
| <b>PCD</b>                 |      |           |                    |                   |                   |
| No                         | 4314 | 1.0 (ref) | 1.17 (0.98, 1.39)  | 1.72 (1.46, 2.02) | 0.931             |
| Yes                        | 292  | 1.0 (ref) | 1.15 (0.61, 2.19)  | 1.86 (1.05, 3.32) |                   |
| <b>Atrial fibrillation</b> |      |           |                    |                   |                   |
| No                         | 2529 | 1.0 (ref) | 1.04 (0.82, 1.31)  | 1.59 (1.28, 1.98) | 0.437             |
| Yes                        | 2077 | 1.0 (ref) | 1.29 (1.02, 1.64)  | 1.84 (1.47, 2.31) |                   |
| <b>Pneumonia</b>           |      |           |                    |                   |                   |
| No                         | 3256 | 1.0 (ref) | 1.18 (0.96, 1.44)  | 1.89 (1.56, 2.29) | 0.061             |
| Yes                        | 1350 | 1.0 (ref) | 1.09 (0.82, 1.45)  | 1.33 (1.03, 1.74) |                   |
| <b>COPD</b>                |      |           |                    |                   |                   |
| No                         | 4361 | 1.0 (ref) | 1.16 (0.98, 1.38)  | 1.72 (1.47, 2.02) | 0.962             |
| Yes                        | 245  | 1.0 (ref) | 1.32 (0.54, 3.20)  | 1.86 (0.83, 4.17) |                   |
| <b>Liver diseases</b>      |      |           |                    |                   |                   |
| No                         | 4374 | 1.0 (ref) | 1.26 (1.06, 1.50)  | 1.85 (1.57, 2.18) | 0.065             |
| Yes                        | 232  | 1.0 (ref) | 0.62 (0.34, 1.13)  | 1.24 (0.70, 2.21) |                   |



436 **Table 4.** Continued.

|                | N    | SII       |                    |                   | P for interaction |
|----------------|------|-----------|--------------------|-------------------|-------------------|
|                |      | <1144.28  | ≥1144.28, <2730.11 | ≥2730.11          |                   |
| Renal failure  |      |           |                    |                   | 0.396             |
| No             | 3486 | 1.0 (ref) | 1.10 (0.91, 1.33)  | 1.72 (1.44, 2.05) |                   |
| Yes            | 1120 | 1.0 (ref) | 1.39 (1.00, 1.94)  | 1.79 (1.30, 2.48) |                   |
| Hypothyroidism |      |           |                    |                   | 0.628             |
| No             | 4051 | 1.0 (ref) | 1.13 (0.95, 1.35)  | 1.71 (1.45, 2.01) |                   |
| Yes            | 555  | 1.0 (ref) | 1.46 (0.90, 2.38)  | 1.96 (1.23, 3.12) |                   |
| Stroke         |      |           |                    |                   | 0.618             |
| No             | 4356 | 1.0 (ref) | 1.14 (0.96, 1.36)  | 1.69 (1.44, 1.99) |                   |
| Yes            | 250  | 1.0 (ref) | 1.45 (0.79, 2.65)  | 2.24 (1.26, 3.97) |                   |
| Depression     |      |           |                    |                   | 0.216             |
| No             | 4247 | 1.0 (ref) | 1.17 (0.98, 1.39)  | 1.79 (1.52, 2.10) |                   |
| Yes            | 359  | 1.0 (ref) | 1.11 (0.55, 2.25)  | 1.02 (0.51, 2.03) |                   |
| Malignancy     |      |           |                    |                   | 0.879             |
| No             | 4353 | 1.0 (ref) | 1.18 (0.99, 1.40)  | 1.72 (1.46, 2.02) |                   |
| Yes            | 253  | 1.0 (ref) | 1.02 (0.57, 1.83)  | 1.57 (0.94, 2.63) |                   |
| SOFA           |      |           |                    |                   | 0.172             |
| <5             | 2149 | 1.0 (ref) | 1.24 (0.91, 1.70)  | 2.21 (1.66, 2.96) |                   |
| ≥5             | 2457 | 1.0 (ref) | 1.20 (0.99, 1.46)  | 1.58 (1.31, 1.90) |                   |
| SAPSI          |      |           |                    |                   | 0.255             |
| <40            | 2181 | 1.0 (ref) | 1.22 (0.87, 1.71)  | 1.99 (1.43, 2.75) |                   |
| ≥40            | 2425 | 1.0 (ref) | 1.13 (0.93, 1.37)  | 1.42 (1.19, 1.69) |                   |

437

438

439

440

441

442

443

444 **Table 5. The clinical characteristics in critically ill patients with CHF before and after PSM.**

| Parameter               | Before PSM          |                     |         | After PSM           |                     |         |
|-------------------------|---------------------|---------------------|---------|---------------------|---------------------|---------|
|                         | <5533.4             | ≥5533.4             | P value | <5533.4             | ≥5533.4             | P value |
| N                       | 3995                | 611                 |         | 602                 | 602                 | 602     |
| <b>Demographics</b>     |                     |                     |         |                     |                     |         |
| Age, years              | 74.4 (63.4-82.9)    | 76.9 (68.2-83.7)    | <0.001  | 77.7 (66.1-84.2)    | 76.9 (68.1-83.7)    | 0.984   |
| Male, n (%)             | 2154 (53.9%)        | 282 (46.2%)         | <0.001  | 279 (46.3%)         | 279 (46.3%)         | 1.000   |
| Ethnicity, n (%)        |                     | 0.001               | 0.001   |                     |                     | 0.526   |
| White                   | 2879 (72.1%)        | 470 (76.9%)         |         | 463 (76.9%)         | 461 (76.6%)         |         |
| Black                   | 309 (7.7%)          | 23 (3.8%)           |         | 30 (5.0%)           | 23 (3.8%)           |         |
| Others                  | 807 (20.2%)         | 118 (19.3%)         |         | 109 (18.1%)         | 118 (19.6%)         |         |
| <b>Vital signs</b>      |                     |                     |         |                     |                     |         |
| HR, beats/minute        | 84.5 (74.1-96.0)    | 88.2 (77.0-99.6)    | <0.001  | 87.5 (77.3-98.8)    | 87.9 (76.8-99.2)    | 0.840   |
| RR, times/minute        | 19.3 (16.8-22.3)    | 20.3 (17.6-23.2)    | <0.001  | 20.2 (17.3-23.5)    | 20.2 (17.6-23.1)    | 0.876   |
| SBP, mmHg               | 113.8 (104.6-126.0) | 113.8 (104.6-126.0) | 0.145   | 113.9 (103.4-125.6) | 112.1 (103.5-125.7) | 0.964   |
| DBP, mmHg               | 57.1 (51.1-63.9)    | 55.7 (50.2-62.5)    | 0.009   | 55.3 (49.1-61.9)    | 55.6 (50.2-62.5)    | 0.219   |
| Temperature, °C         | 36.8 (36.4-37.2)    | 36.7 (36.3-37.1)    | 0.010   | 36.8 (36.4-37.2)    | 36.7 (36.3-37.1)    | 0.254   |
| SpO <sub>2</sub> , %    | 97.3 (95.8-98.5)    | 97.0 (95.5-98.4)    | 0.157   | 97.3 (95.6-98.5)    | 97.0 (95.5-98.4)    | 0.474   |
| Weight, kg              | 78.4 (65.0-94.3)    | 74.4 (61.0-90.0)    | <0.001  | 73.0 (61.0-88.5)    | 74.4 (61.0-90.0)    | 0.560   |
| <b>Therapies, n (%)</b> |                     |                     |         |                     |                     |         |
| ACEI                    | 1117 (28.0%)        | 149 (24.4%)         | 0.065   | 153 (25.4%)         | 147 (24.4%)         | 0.689   |
| ARB                     | 158 (4.0%)          | 25 (4.1%)           | 0.872   | 26 (4.3%)           | 25 (4.2%)           | 0.886   |
| β-blocker               | 2454 (61.4%)        | 373 (61.0%)         | 0.858   | 373 (62.0%)         | 367 (61.0%)         | 0.722   |
| Digoxin                 | 411 (10.3%)         | 64 (10.5%)          | 0.888   | 85 (14.1%)          | 63 (10.5%)          | 0.053   |
| Furosemide              | 2766 (69.2%)        | 424 (69.4%)         | 0.937   | 412 (68.4%)         | 416 (69.1%)         | 0.804   |
| Statins                 | 1274 (31.9%)        | 177 (29.0%)         | 0.148   | 158 (26.2%)         | 174 (28.9%)         | 0.302   |
| Dialysis                | 426 (10.7%)         | 52 (8.5%)           | 0.104   | 86 (14.3%)          | 51 (8.5%)           | 0.001   |
| Vasopressor             | 1042 (26.1%)        | 192 (31.4%)         | 0.008   | 171 (28.4%)         | 187 (31.1%)         | 0.313   |
| Ventilation             | 1561 (39.1%)        | 318 (52.0%)         | <0.001  | 306 (50.8%)         | 310 (51.5%)         | 0.818   |
| Assisted circulation    | 259 (6.5%)          | 23 (3.8%)           | 0.009   | 21 (3.5%)           | 23 (3.8%)           | 0.759   |
| <b>Scores</b>           |                     |                     |         |                     |                     |         |
| SOFA                    | 5.0 (3.0-7.0)       | 5.0 (3.0-7.0)       | 0.556   | 5.0 (3.0-7.0)       | 5.0 (3.0-7.0)       | 0.405   |
| SAPSII                  | 40.0 (32.0-49.0)    | 45.0 (36.0-53.5)    | <0.001  | 44.0 (35.0-53.0)    | 45.0 (36.0-53.0)    | 0.440   |

445 **Table 5.** Continued.

| Parameter                    | Before PSM          |                     |         | After PSM           |                     |         |
|------------------------------|---------------------|---------------------|---------|---------------------|---------------------|---------|
|                              | <5533.4             | ≥5533.4             | P value | <5533.4             | ≥5533.4             | P value |
| N                            | 3995                | 611                 |         | 602                 | 602                 |         |
| <b>Laboratory events</b>     |                     |                     |         |                     |                     |         |
| Hemoglobin, g/dl             | 11.0 (9.7-12.4)     | 10.7 (9.5-12.1)     | 0.008   | 10.7 (9.5-11.9)     | 10.7 (9.5-12.1)     | 0.290   |
| Creatinine, mg/dl            | 1.2 (0.9-1.8)       | 1.2 (0.9-2.1)       | 0.250   | 1.3 (0.9-2.0)       | 1.2 (0.9-2.1)       | 0.160   |
| BUN, mg/dl                   | 26.0 (18.0-42.0)    | 30.0 (19.0-49.0)    | <0.001  | 31.0 (20.0-49.0)    | 30.0 (19.0-48.0)    | 0.613   |
| Glucose, mg/dl               | 134.0 (114.4-163.6) | 145.5 (119.7-176.8) | <0.001  | 141.2 (117.1-180.3) | 145.5 (119.6-176.2) | 0.610   |
| Sodium, mmol/L               | 139.0 (136.0-141.0) | 138.0 (135.0-141.0) | <0.001  | 138.0 (135.0-141.0) | 138.0 (135.0-141.0) | 0.487   |
| Potassium, mmol/L            | 4.2 (3.8-4.6)       | 4.2 (3.7-4.7)       | 0.575   | 4.2 (3.8-4.7)       | 4.2 (3.7-4.7)       | 0.634   |
| Chloride, mmol/L             | 103.0 (100.0-107.0) | 102.0 (98.0-107.0)  | <0.001  | 103.0 (99.0-106.0)  | 102.0 (98.0-107.0)  | 0.377   |
| Bicarbonate, mmol/L          | 25.0 (21.0-28.0)    | 24.0 (20.0-27.0)    | <0.001  | 24.0 (20.0-27.0)    | 24.0 (20.0-27.0)    | 0.878   |
| PT, second                   | 14.3 (13.2-16.8)    | 14.4 (13.2-17.1)    | 0.245   | 14.4 (13.2-17.3)    | 14.4 (13.2-17.2)    | 0.846   |
| APTT, second                 | 31.8 (27.3-41.1)    | 31.6 (27.3-38.6)    | 0.329   | 31.3 (27.3-40.2)    | 31.7 (27.3-38.7)    | 0.920   |
| Lactate, mmol/L              | 1.9 (1.3-2.9)       | 1.8 (1.3-2.8)       | 0.654   | 1.8 (1.3-3.0)       | 1.8 (1.3-2.8)       | 0.654   |
| Albumin, g/dL                | 3.0 (2.6-3.4)       | 2.9 (2.5-3.3)       | <0.001  | 2.8 (2.4-3.3)       | 2.9 (2.5-3.3)       | 0.255   |
| Bilirubin, mg/dL             | 1.5 (0.6-3.1)       | 0.9 (0.4-2.5)       | <0.001  | 1.1 (0.5-2.4)       | 0.9 (0.4-2.6)       | 0.282   |
| ALT, IU/L                    | 62.0 (22.0-309.0)   | 50.0 (21.0-242.7)   | 0.034   | 51.0 (21.0-225.8)   | 50.0 (21.0-248.5)   | 0.637   |
| NT-proBNP, ng/ml             | 10.9 (4.6-18.6)     | 12.1 (5.1-19.8)     | 0.019   |                     |                     |         |
| cTnT, ng/mL                  | 1.4 (0.1-2.9)       | 1.1 (0.1-2.5)       | 0.016   | 1.1 (0.1-2.8)       | 1.1 (0.1-2.5)       | 0.768   |
| CI, L/min/m <sup>2</sup>     | 2.8 (2.1-3.5)       | 2.8 (2.2-3.5)       | 0.309   | 2.8 (2.1-3.4)       | 2.8 (2.2-3.5)       | 0.938   |
| Urine output, L              | 1.6 (0.9-2.5)       | 1.4 (0.8-2.1)       | <0.001  | 1.4 (0.7-2.2)       | 1.4 (0.8-2.1)       | 0.522   |
| <b>Hospitalization type</b>  |                     |                     | 0.002   |                     |                     | 0.238   |
| Emergency, n (%)             | 3498 (87.6%)        | 564 (92.3%)         |         | 538 (89.4%)         | 555 (92.2%)         |         |
| Elective, n (%)              | 338 (8.5%)          | 29 (4.7%)           |         | 39 (6.5%)           | 29 (4.8%)           |         |
| <b>First ICU admission</b>   |                     |                     | <0.001  |                     |                     | 0.004   |
| CCU, n (%)                   | 1098 (27.5%)        | 138 (22.6%)         |         | 143 (23.8%)         | 138 (22.9%)         |         |
| <b>Length of ICU stay, h</b> | 93.0 (50.0-184.0)   | 109.0 (54.0-204.0)  | 0.003   | 118.5 (59.0-228.8)  | 109.0 (53.0-201.8)  | 0.128   |
| <b>Comorbidities, n (%)</b>  |                     |                     |         |                     |                     |         |
| Hypertension                 | 830 (20.8%)         | 107 (17.5%)         | 0.062   | 126 (20.9%)         | 106 (17.6%)         | 0.144   |
| Hyperlipemia                 | 1120 (28.0%)        | 140 (22.9%)         | 0.008   | 133 (22.1%)         | 138 (22.9%)         | 0.730   |
| Diabetes mellitus            | 1449 (36.3%)        | 208 (34.0%)         | 0.285   | 205 (34.1%)         | 205 (34.1%)         | 1.000   |

446 **Table 5.** Continued.

| Parameter                     | Before PSM   |             |         | After PSM   |             |         |
|-------------------------------|--------------|-------------|---------|-------------|-------------|---------|
|                               | <5533.4      | ≥5533.4     | P value | <5533.4     | ≥5533.4     | P value |
| N                             | 3995         | 611         |         | 602         | 602         |         |
| <b>Comorbidities, n (%)</b>   |              |             |         |             |             |         |
| Atrial fibrillation           | 1783 (44.6%) | 294 (48.1%) | 0.107   | 281 (46.7%) | 290 (48.2%) | 0.603   |
| AMI                           | 301 (7.5%)   | 45 (7.4%)   | 0.882   | 39 (6.5%)   | 44 (7.3%)   | 0.570   |
| VHD                           | 402 (10.1%)  | 61 (10.0%)  | 0.952   | 88 (14.6%)  | 61 (10.1%)  | 0.018   |
| Peripheral vascular           | 511 (12.8%)  | 66 (10.8%)  | 0.167   | 88 (14.6%)  | 64 (10.6%)  | 0.037   |
| Pulmonary circulation         | 239 (6.0%)   | 53 (8.7%)   | 0.011   | 45 (7.5%)   | 52 (8.6%)   | 0.459   |
| Pneumonia                     | 1108 (27.7%) | 242 (39.6%) | <0.001  | 235 (39.0%) | 237 (39.4%) | 0.906   |
| COPD                          | 188 (4.7%)   | 57 (9.3%)   | <0.001  | 48 (8.0%)   | 53 (8.8%)   | 0.603   |
| Liver diseases                | 214 (5.4%)   | 18 (2.9%)   | 0.011   | 20 (3.3%)   | 18 (3.0%)   | 0.742   |
| Renal failure                 | 982 (24.6%)  | 138 (22.6%) | 0.284   | 162 (26.9%) | 136 (22.6%) | 0.083   |
| Stroke                        | 227 (5.7%)   | 23 (3.8%)   | 0.051   | 38 (6.3%)   | 23 (3.8%)   | 0.052   |
| Hypothyroidism                | 461 (11.5%)  | 94 (15.4%)  | 0.007   | 97 (16.1%)  | 92 (15.3%)  | 0.692   |
| Malignancy                    | 209 (5.2%)   | 44 (7.2%)   | 0.047   | 31 (5.1%)   | 43 (7.1%)   | 0.150   |
| Depression                    | 303 (7.6%)   | 56 (9.2%)   | 0.175   | 50 (8.3%)   | 56 (9.3%)   | 0.542   |
| <b>30-day mortality</b>       | 769 (19.2%)  | 204 (33.4%) | <0.001  | 150 (24.9%) | 200 (33.2%) | 0.002   |
| <b>90-day mortality</b>       | 1120 (28.0%) | 260 (42.6%) | <0.001  | 211 (35.0%) | 253 (42.0%) | 0.013   |
| <b>Hospital-day mortality</b> | 659 (16.5%)  | 172 (28.2%) | <0.001  | 135 (22.4%) | 167 (27.7%) | 0.033   |

447

448

449

450

451

452

453

454

455

456

457 **Figure 1.** Workflow for screening study subjects. ICU, intensive care unit.

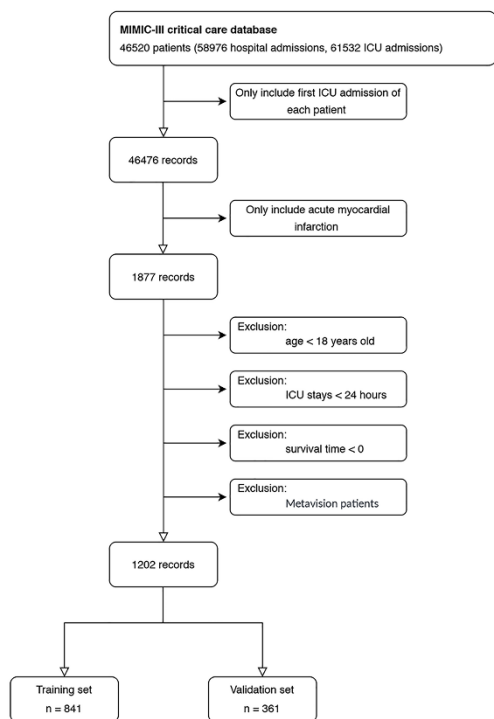

458

459 **Figure 2.** The non-linear curve fitting of the association between SII and 30- (A) and 90- (B) day all-  
460 cause mortalities in critically ill patients with CHF after adjusting for age, gender, race, and other  
461 potential variables. SII, systemic immune-inflammation index. CHF, congestive heart failure.

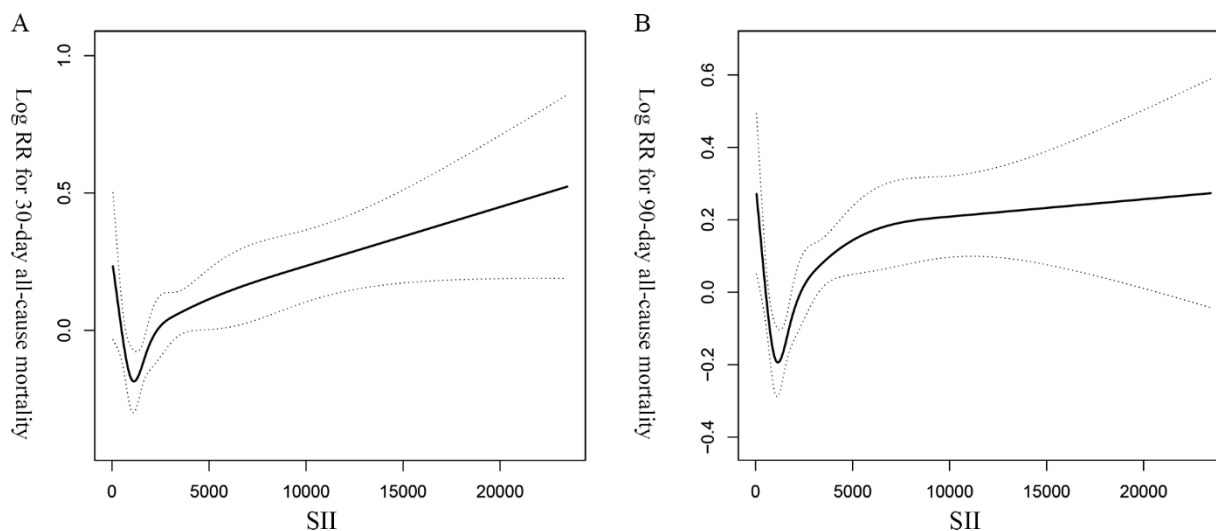

462

463 **Figure 3.** Kaplan-Meier survival curves showing the 30- (A) and 90- (B) day all-cause mortalities  
464 stratified by SII tertile in critically ill patients with CHF. SII, systemic immune-inflammation index.  
465 CHF, congestive heart failure.

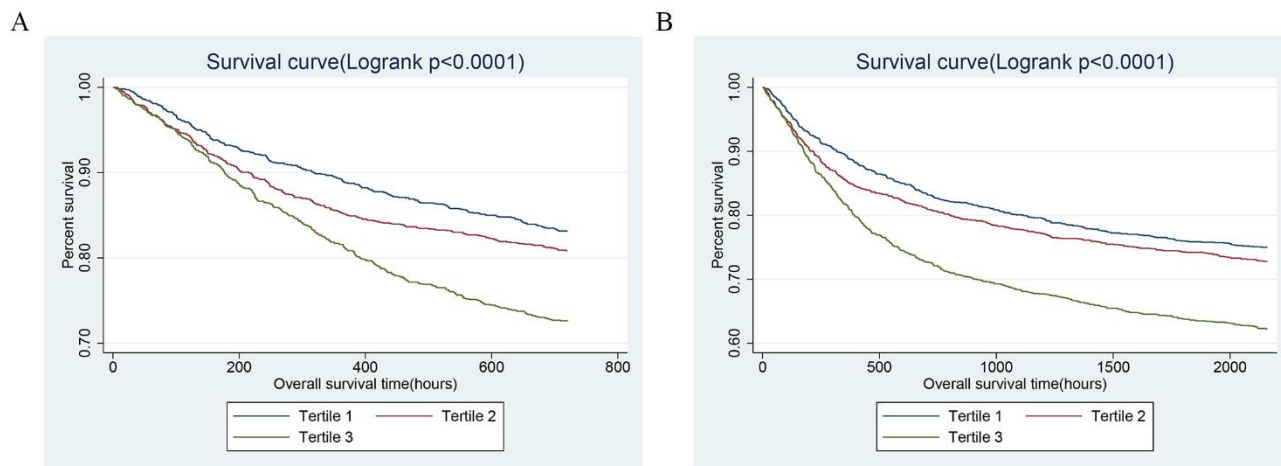

466

467 **Figure 4.** The bar chart presenting the range of propensity scores and the corresponding number of  
468 matches in high (red) and low (blue) SII groups. SII, systemic immune-inflammation index.

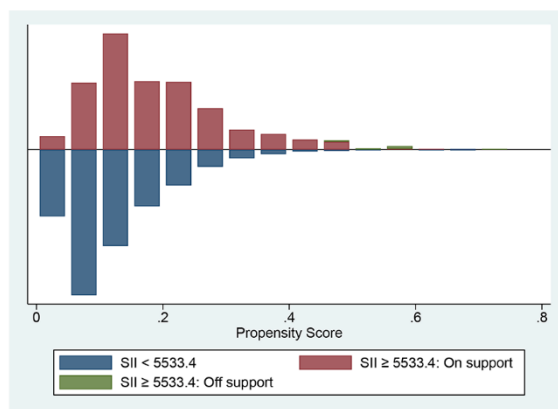

469

470 **Figure 5.** Kaplan-Meier survival curves showing the 30- (A) and 90- (B) day all-cause mortalities  
471 stratified by cut-off value of SII in critically ill patients with CHF before PSM. C and D presented the  
472 correlation between SII and 30- and 90-day mortalities after PSM, separately. SII, systemic immune-  
473 inflammation index. CHF, congestive heart failure. PSM, propensity score matching.

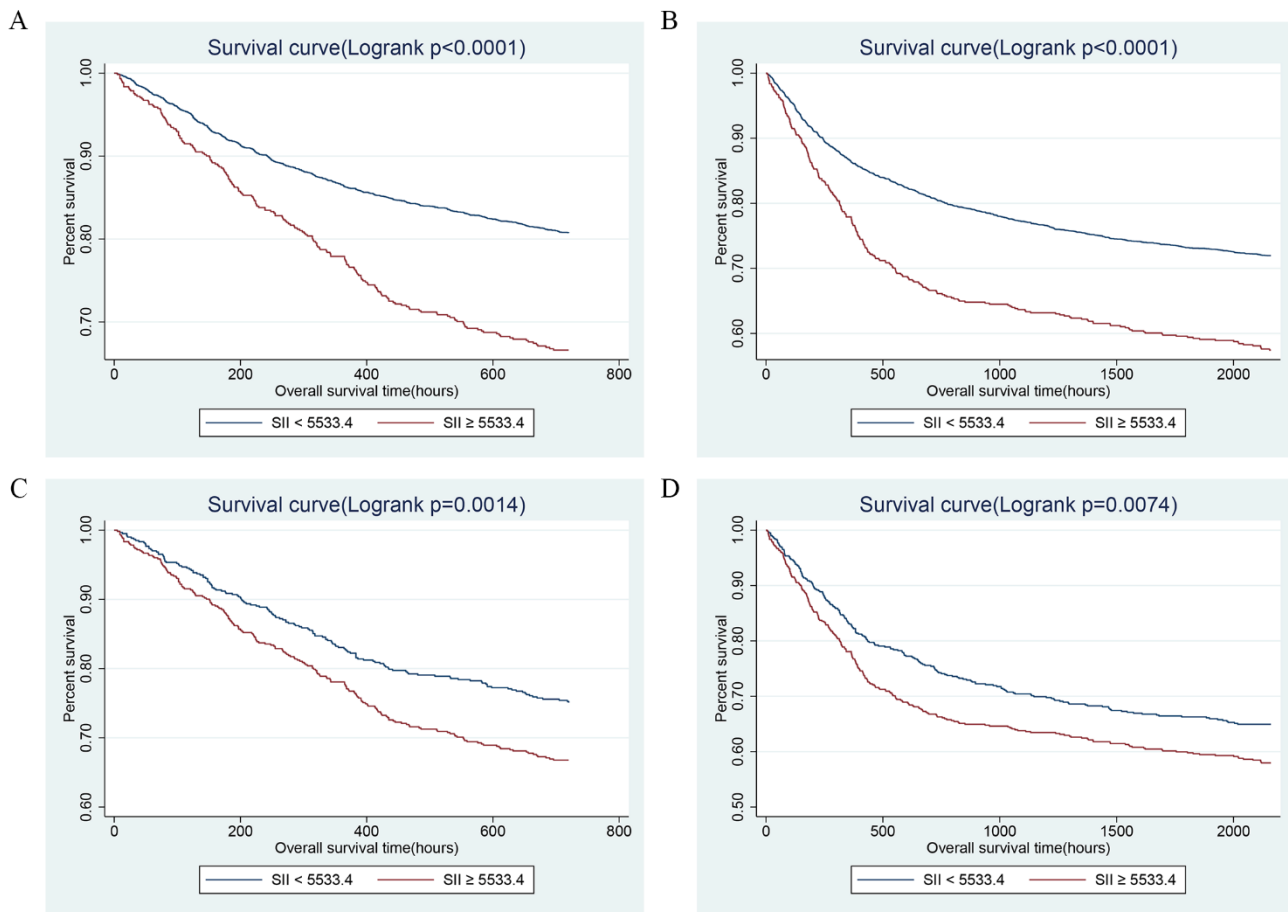

474

475 **Figure 6.** The forest plot showing the univariate (A) and multivariate (B) Cox regression for effects  
476 of SII on short-term mortality in the critically ill patients with CHF before and after PSM. SII,  
477 systemic immune-inflammation index. CHF, congestive heart failure. PSM, propensity score  
478 matching.

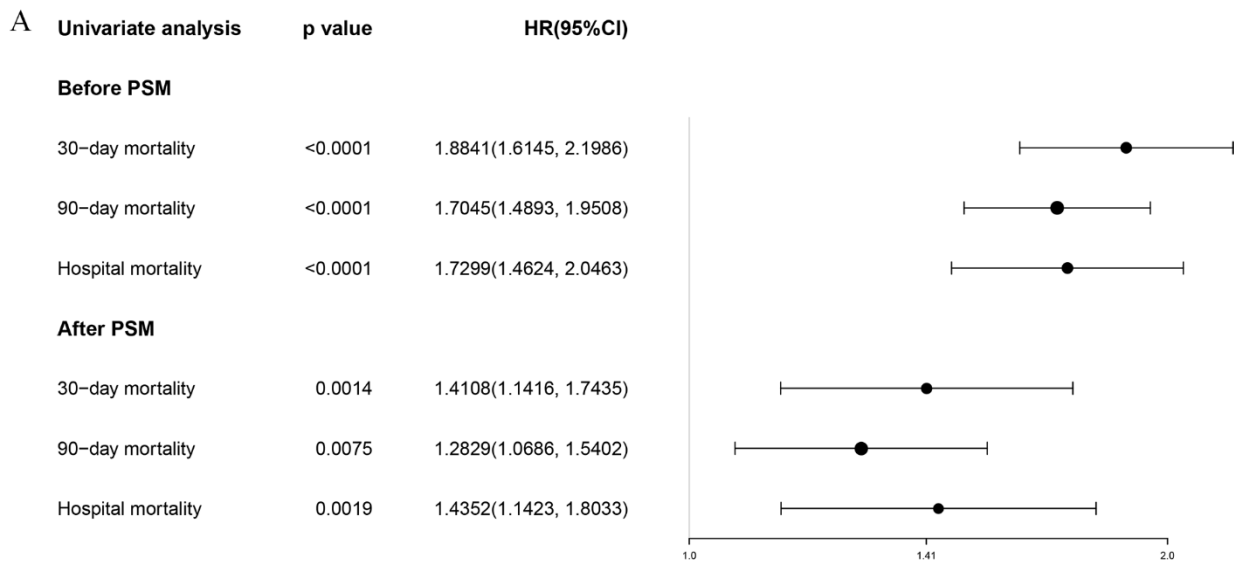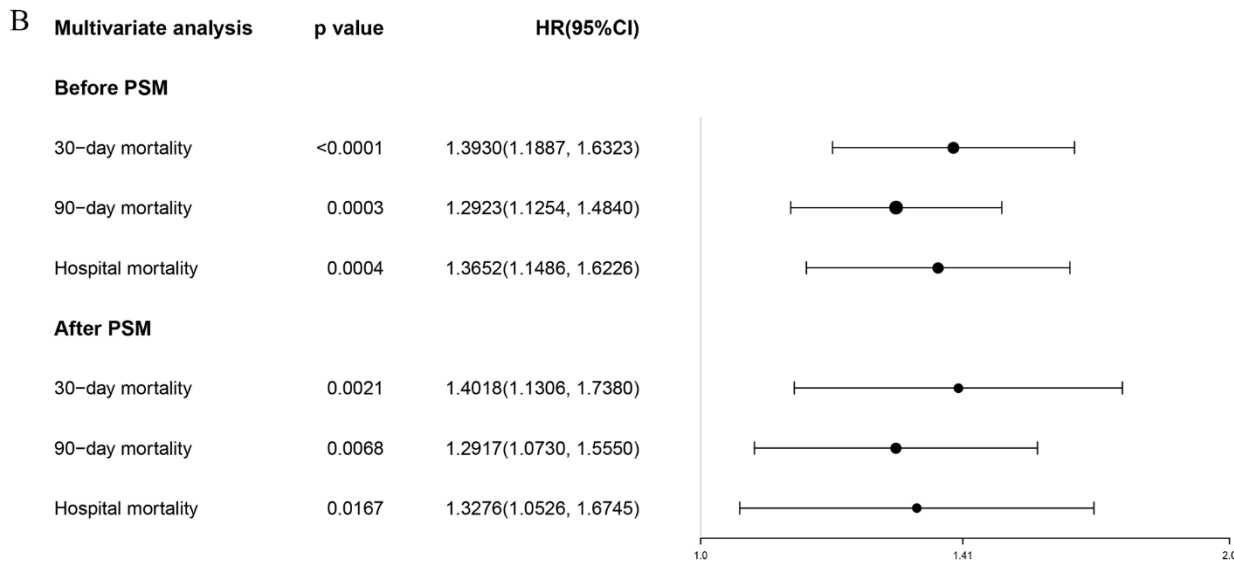

Source: https://medrxiv.org/content/10.1101/2021.08.03.21261549v1.full.pdf
